# Supplementary material for: Analysis of the drivers of ASF introduction into pig compartments in South Africa and implications for the revision of biosecurity standards
Source: Research Square preprint supplement (doi:10.21203/rs.3.rs-1638496/v1), 2022-05-19
Supplement: Supplementary file 3 [file ef2f00978d80044abcd8ec31.xlsx]

## Sheet: Sheet1
Category	Code	Risk Factor	Description	Reference (risk factor)	Relevance towards Intro/ Spread/ Both	Reccomended Preventive Measure against risk factor	Reference (preventive measures)	Pork 360 Standards (relevant against risk factor)	Relevance of the risk factor for SAPPO compartments (*). Drop down menu is provided clicking in the cell.		(*) This is intended as an average score indicating how much a specific risk factor is relevant , on average, for the majority of SAPPO compartments. The score is on a scale from 0 (negligible) to 5 (very high). In case a general assessment cannot be made due to very different situation between farms please rate as NA (Not applicable).
Domestic pigs	1.1	Domestic pig and smallholder density	If there is a high density of pigs on farms or or a high density of smallholders within administrative areas, there is a higher chance of introduction and spread through direct and indirect contact. This risk factor can be subclassified by production system.	Huang, et al., 2017; Bellini, et al., 2021	Both	Follow ideal stocking density recommendations. Separate sick pigs.	Fasina, et al., 2020; Biocheck	5.1 On the farm plan the number of pens/crates, the area of pens/ size of crates, area per pen, maximum number of pigs per pen and the number of pigs that can be housed in each and every building. (NB if pens of differing sizes are present in a house the information on area, space allowed and max. animals/pen must be reflected for the different size pens). 5.3.3 The minimum floor space allowances…
	1.2	Proximity to an infected farm	Compartments that are geographically close to ASF infected farms are at higher risk of becoming infected through direct and indirect transmission	Bellini, et al., 2021	Both	Compartments neighboring infected farms implement a provisional quarantine of the compartment
	1.3	Introduction of new pigs to a farm without testing or quarantine	Introduction of a new pig(s) onto a farm, such as replacement gilts, from a source that is not ASF-free and without testing or quarantine can result in introduction of ASF virus into the farm. Premises with a high number of incoming movements are likely to be at risk of disease introduction.	Bellini, et al., 2021	Introduction	Quarantine newly purchased pigs for at least 10 days. Establish an isolation facility on site. Animal access restrictions and testing	Fasina, et al., 2020; DAFF, 2011; Biocheck	1.5.2 A register of all pigs entering and leaving the unit must be kept. The register must indicate: Source, Contact details, Age at arrival, Treatment on arrival. 1.5.3 All pigs entering the unit must come from a Pork 360 unit.
	1.4	Shared boars for mating	ASF virus can be transmitted through semen, resulting in introduction and spread to sows on different farms	Fasina, et al., 2020	Both	Use artifical insemination from known ASF-free sources. No sows and/or boar used for reproduction are allowed on non-commercial farms.	DAFF, 2011; EC, 2015; Biocheck
	1.5	Presence of free-roaming pigs within the compartment	Free-ranging husbandry system have implications for ASF transmission through direct and indirect contact with domestic and wild pigs (ingestion of contaminated slaughter remains and pork products)	Fasina, et al., 2020; Bellini, et al., 2021	Both	Fence in compartment with non-porous fencing. Keep pigs indoors.	Fasina, et al., 2020; DAFF, 2011	1.1.1 All pig production areas / units must be totally and effectively fenced (pig proof) with a fence that is a minimum of 1.8m high. All access gates must be closed and locked at all times. Limited access shall be allowed. Highly recommended that a concrete or similar base be used to secure bottom of the fence and to prevent animals burrowing under fence. 1.1.2 An SOP is required detailing when…
	1.6	Presence of free-roaming pigs in proximity to the compartment	Scavenging pigs around the compartments have implications for ASF transmission through direct and indirect contact (ingestion of contaminated slaughter remains and pork products)	Fasina, et al., 2020	Both	Fence in compartment with non-porous fencing. Keep pigs indoors.	Fasina, et al., 2020	1.1.1 All pig production areas / units must be totally and effectively fenced (pig proof) with a fence that is a minimum of 1.8m high. All access gates must be closed and locked at all times. Limited access shall be allowed. Highly recommended that a concrete or similar base be used to secure bottom of the fence and to prevent animals burrowing under fence. 1.1.2 An SOP is required detailing when…
	1.7	Pigs presented at the abattoir, slaughter slabs, markets, auctions and returned home afterwards	Direct contact of pigs at abattoirs, slaughter slabs, markets, and auctions can result in transmission, especially if those pigs travel back to their home farms or to another farm without being slaughtered	Fasina, et al., 2020	Both	Avoid the purchase of animals, limit the frequency of introduction, limit the number of source herds, source herds with a high health status. Avoid bringing pigs back home from the slaughter house because they are not slaughtered.	Biocheck
	1.8	Outgoing pig movements	Premises with a high number of outgoing movements are key players for the disease spread	Bellini, et al., 2021	Spread	Limit the number of outgoing pig movements through all-in-all-out systems/Increase traceability	Fasina, et al., 2020	1.5.2 A register of all pigs entering and leaving the unit must be kept. The register must indicate: Source, Contact details, Age at arrival, Treatment on arrival.
Wild suids	2.1	Wild suid species occurrence within the compartment	Percentage area in each compartment entity that is occupied by each wild suid species is considered. Then whether or not the wild suid species occurrences were correlated with ASF occurrence is tested.	Huang, et al., 2017	Both	Stock-proof fencing of at least the compartment/ stable where pigs are kept. Keep pigs indoors. Targeted hunting/culling is encouraged in order to target adult and sub-adult females. The minimum biosecurity requirements for hunters are applied. Surveillance of wild boar.	Fasina, et al., 2020; EC, 2015
	2.2	Wild suid species occurrence in proximity to the compartment	Percentage area in proximity to the compartment entity that is occupied by each wild suid species is calculated. Then whether or not the wild suid species occurrences were correlated with ASF occurrence is tested.	Huang, et al., 2017	Both	Stock-proof fencing of at least the compartment/ stable where pigs are kept. Keep pigs indoors. Targeted hunting/culling is encouraged in order to target adult and sub-adult females. The minimum biosecurity requirements for hunters are applied. Surveillance of wild boar.	Fasina, et al., 2020; EC, 2015
	2.3	Direct and indirect contact between wild and domestic suids	Where there is no or porous fencing of the compartment, there can be direct and indirect contact between wild and domestic suids	Bellini, et al., 2021	Both	Stock-proof fencing of at least the compartment/ stable where pigs are kept. Keep pigs indoors. Targeted hunting/culling is encouraged in order to target adult and sub-adult females. The minimum biosecurity requirements for hunters are applied. Surveillance of wild boar.	Fasina, et al., 2020; EC, 2015	1.1.1 All pig production areas / units must be totally and effectively fenced (pig proof) with a fence that is a minimum of 1.8m high. All access gates must be closed and locked at all times. Limited access shall be allowed. Highly recommended that a concrete or similar base be used to secure bottom of the fence and to prevent animals burrowing under fence. 1.1.2 An SOP is required detailing when…
Human behaviors and activities (trades, hunting etc..)	3.1	Human population density	Human population density is an indicator of trade activities. Calculated for each administrative area	Huang, et al., 2017; Bellini, et al., 2021	Both
	3.2	Trade route distribution	In combination with pig cases and human distribution	Bellini, et al., 2021	Both
	3.3	Pig trader, middlemen, and transporter behavior	Pig traders and middlemen travel around to buy pigs in bulk from multiple sources, farms and locations. They enter many farms directly to buy pigs and move live pigs from farms to markets and vice versa. Some districts share livestock markets with neighboring districts. Many pigs, bought from different homesteads, may be transported together to the markets in the same vehicles (pick-up vans, smal…	Fasina, et al., 2020; Bellini, et al., 2021	Both	Regulate access to farms/Hand sanitizer, gloves and washing	Fasina, et al., 2020
	3.4	Pig-keeper visitors and Livestock field officers/ veterinarians/ para-veterinarians	People who handle pigs in different capacities meet at the slaughter facilities or each others homes where they can spread the ASF virus to pigs via fomites and contaminated pork products. Livestock field officers who visit farms and abattoirs who don't always properly clean and disinfect their clothes and equipment between sites can act as fomites for ASF virus	Fasina, et al., 2020; Bellini, et al., 2021	Both	Register of visitors. Declaration for employees and visitors. No unauthorized persons/transport are allowed to enter the pig holding (stable) and records are kept of people and vehicles accessing the area where the pigs are kept. Foot dips for disinfection before the house. Change rubber boots/slippers. Change clothing when going in/out of pig pen. Make hand sanitizer, gloves and washing availabl…	Fasina, et al., 2020; DAFF, 2011; EC, 2015; Biocheck	1.3.1 Access of humans must be described in an SOP and should take place as follows: It is a pre-requisite that under all circumstances, persons entering the unit will shower into the unit and be provided with clean clothing on the other side of the shower. Cross contamination between own clothing and the piggery’s clothing must be prevented. When leaving the unit again persons will shower out an…
	3.5	Swill feeding	Feeding of commercial or household food waste containing contaminated pork products or blood to pigs can be a source of indirect transmission. The contaminated meat may have been stored chilled, frozen, or treated and may have been kept over long periods of time	Bellini, et al., 2020	Introduction	Prohibit swill feeding and enforce removal of animal by-products. Raise awareness through risk communication.	DAFF, 2011; EC, 2015	4.1.1 Home-mixers: All feed additives, vitamin & mineral premixes, or macro minerals including orally administered products must be registered in terms of Act 36 or be accompanied by a certificate guaranteeing that they comply with the Regulation R70 of 12 February 2010 issued under the Act 36 of 1947 (Fertilizer, Farm Feeds, Agricultural Remedies and Stock Remedies Act). NOTE: SANS 898:2011 Edit…
	3.6	Illegal animal/ pork movements and imports	In smallholdings and in free-ranging pigs, there is often a low level of compliance with legal requirements on registration and identification of pigs and these deficiencies reduce the effectiveness of disease management, hampering the eradication process. illegal trades of livestock occur across the borders and may have facilitated the introduction and transmission	Bellini, et al., 2021	Both	Raise awareness through risk communication
	3.7	Lack of identification of pig and documentation of pig movements	Poor traceability can promote ASF spread	Bellini, et al., 2021	Both	Use an animal identification system and keep records of animal health and movements	Fasina, et al., 2020; DAFF, 2011	6.3.1 The following is necessary with regards to marking of pigs: All pigs must be tattooed with a registered tattoo mark by the time they are weaned. 6.3.2 A copy of the Registration certificate must be available in SOP master file. 6.3.3 All pigs must be marked with their week of birth (tattoo or ear notch)
	3.8	Abandoning or intentional feeding of leftovers in wild suid habitats	Contaminated pork products may be consumed/trasnported by wild pigs or other scavengers animals (birds). Artifical feeding of wild boar can result in ASF virus spread.	Bellini, et al., 2021	Spread	Prohibit feeding of wild boar through risk communication, regulations, and signage.	EC, 2015	2.1.4 A canteen (if meals are consumed within the biosecurity area), must be provided, and all food must be taken directly to the designated eating facility. No pork or raw meat is allowed in the unit/canteen. Employees are only allowed to eat in the designated eating facility, no food shall be taken into pig housing.
	3.9	Usage of out-of-farm pig semen, ova or embryos	ASF virus can be spread through breeding practices	Bellini, et al., 2021	Spread	Use semen/ ova/ embryos from known ASF-free sources	DAFF, 2011
	3.1	Suspected cases underreporting, and “emergency sales”	Weaker monitoring and traceability	Bellini, et al., 2021	Spread	Raise awareness on the importance of reporting suspect cases to veterinary and livestock field officers during ASF outbreaks. Build trust through risk communication.	Fasina, et al., 2020	6.9 All deaths of post-weaning animals and adult animals must be recorded in a register indicating suspected reasons.
	3.11	Illegal slaughtering and slaughtering of sick pigs	Weaker monitoring and traceability	Bellini, et al., 2021	Spread	Raise awareness through risk communication		6.7 Producers shall liaise with the relevant abattoir should they have a need for emergency slaughter. No systemically ill pigs shall be marketed for slaughter.
	3.12	Slaughtering on the farm	Spread of contaminated blood	Bellini, et al., 2021	Spread	Home slaughtering is allowed only under veterinary supervision.	EC, 2015	6.7 Producers shall liaise with the relevant abattoir should they have a need for emergency slaughter. No systemically ill pigs shall be marketed for slaughter.
	3.13	Higher levels of human deprivation/ poverty	Lower compliance to report and test if there is no financial compensation for culling	Bellini, et al., 2021	Spread	Adequate financial compensation. Risk communication.	Bellini, et al., 2021
	3.14	Cultural identity associated with backyard farming	Lower compliance to bring pigs indoors, strengthen biosecurity measures	Bellini, et al., 2021	Spread	Raise awareness through risk communication
	3.15	Hunting of wild suids within the compartment	Direct and indirect contact between wild pigs and wild pig carcasses and the soil beneath the carcasses. Hunting of wild suids including as a deterrant to incursion on or near farms can result in spread by wild suid blood. Density of hunters, hunting dogs, feeding/baiting locations, and hunted wild pigs.	Bellini, et al., 2021	Spread	Avoid hunting or culling wild boar within the compartmnet. No contact with pigs within 48h after hunting activity. Find and dispose of wild boar carcasses quickly. The disposal of carcasses to be carried out either by deep burial, bringing to the rendering plant or burning (under supervision of the competent veterinary authorities). Possible use of appropriate chemicals for local disinfection.	Bellini, et al., 2021; EC, 2015
	3.16	Hunting of wild suids in proximity of the compartment	Direct and indirect contact between wild pigs and wild pig carcasses and the soil beneath the carcasses. Hunting of wild suids including as a deterrant to incursion on or near farms can result in spread by wild suid blood. Density of hunters, hunting dogs, feeding/baiting locations, and hunted wild pigs.	Bellini, et al., 2022	Spread	No contact with pigs within 48h after hunting activity. Find and dispose of wild boar carcasses quickly. The disposal of carcasses to be carried out either by deep burial, bringing to the rendering plant or burning (under supervision of the competent veterinary authorities). Possible use of appropriate chemicals for local disinfection.	Bellini, et al., 2021; EC, 2016
Competent vectors	4.1	Presence of the tick vector (tampans) in and around the compartment	The distribution of the tick vector O. savignyi (tampan) has an effect on ASF spread at the regional scale. With the tick distribution map, the probabilities of tick presence for each administrative area are averaged. In case of free roamning of pigs ticks can attach to domestic pigs and transmit the disease	Huang, et al., 2017; Bellini, et al., 2021	Both	Tick control and surveillance/Domestic pigs movement control
	4.2	Presence of biting flies in and around the compartment	Biting flies, such as Stomoxys calcitrans, can transmit the ASF virus via bites or by oral ingestion of infected flies	Bellini et al., 2021	Spread	Fly control
Habitat	5.1	Wild pig habitat area	Habitat structure can influence ASF transmission by affecting host distribution and movements. Overlap of wild and domestic pig habitats	Huang, et al., 2017; Bellini, et al., 2021	Both	Surveillance of wild boar populations. Monitor movements of wild boar.
	5.2	Wild suid habitat isolation and fragmentation	Fragmentation and isolation of wild suid grazing areas can effect the risk of ASF occurrence. Lack of a suitable habitat for wild pigs can drive them into domestic pig habitats.	Huang, et al., 2017; Bellini, et al., 2021	Both	Surveillance of wild boar populations. Monitor movements of wild boar.
Climate	6.1	Annual mean temperature including in preceding year	Temperature can affect ASF transmission by influencing the movements and habitat use of wild suid species. Because of the adaptive process of hosts and ticks, the climatic variables might show lag-effects on pathogen transmission.	Huang, et al., 2017	Both	Surveillance of wild boar and tick populations. Monitor movements of wild boar.
	6.2	Annual mean precipitation including in preceding year	Precipitation can affect ASF transmission by influencing the movements and habitat use of wild suid species. Because of the adaptive process of hosts and ticks, the climatic variables might show lag-effects on pathogen transmission	Huang, et al., 2017	Both	Surveillance of wild boar and tick populations. Monitor movements of wild boar.	DAFF, 2011; EC, 2015; Biocheck	1.4.1 No unauthorised vehicle may enter the fenced pig farming area. An SOP describing authorised and unauthorised vehicles must be in place. All vehicles authorised to enter shall have their tyres and undercarriages decontaminated and disinfected before entering the production unit. 1.4.2 A detailed register of all vehicles entering the unit must be kept. 10.3 All vehicles must be cleaned and di…
Fomites	7.1	Vehicles as fomites	If vehicles used to transport live pigs and pork products are not cleaned & disinfected properly between pig shipments, they can act as fomites for ASFv	Fasina, et al., 2020; Bellini, et al., 2021	Both	Washing and disinfection including of vehicles. Designated area for washing and disinfection of vehicles. Vehicle Access restrictions and biosecurity. Down time for vehicles. Use appropriate vehicle stocking densities. Biosecurity plan approved/recommended by veterinary services	Fasina, et al., 2020; EC, 2015; Biocheck	1.3.1 Access of humans must be described in an SOP and should take place as follows: It is a pre-requisite that under all circumstances, persons entering the unit will shower into the unit and be provided with clean clothing on the other side of the shower. Cross contamination between own clothing and the piggery’s clothing must be prevented. When leaving the unit again persons will shower out an…
	7.2	Clothes & boots as fomites	Clothes worn by farmers, slaughter workers, veterinary officers and any other person who handles pigs can act as fomites of the ASF virus if not cleaned and disinfected properly or if PPE is not used	Fasina, et al., 2020; Bellini, et al., 2021	Both	Foot dips for disinfection before the house. Change rubber boots/slippers. Change clothing when going in/out of pig pen. Biosecurity plan approved/recommended by veterinary services	Fasina, et al., 2020; EC, 2015; Biocheck	7.1 The correct procedures for cleaning and disinfecting shall be established. The procedures need to be developed in consultation with a pig veterinary consultant and include: Physical cleaning, Washing and drying, Disinfecting, Rest period
	7.3	Facilities and equipment	Lack of cleaning and disinfection of facilities and equipment	Bellini, et al., 2021	Both	Routine (regular) cleaning with effective disinfectants. Remove manure and litter routinely. Biosecurity plan approved/recommended by veterinary services	EC, 2015	7.1 The correct procedures for cleaning and disinfecting shall be established. The procedures need to be developed in consultation with a pig veterinary consultant and include: Physical cleaning, Washing and drying, Disinfecting, Rest period
	7.4	Shared equipment between farms and slaughter houses	Lack of cleaning and disinfection of equipment between uses, even when used with symptomatic animals. Lack of cleaning and disinfection of slaughter facilities can lead to ASF virus spread via slaughterhouse workers.	Fasina, et al., 2020	Both	Biosecurity plan approved/recommended by veterinary services	DAFF, 2011; EC, 2015	4.1.1 Home-mixers: All feed additives, vitamin & mineral premixes, or macro minerals including orally administered products must be registered in terms of Act 36 or be accompanied by a certificate guaranteeing that they comply with the Regulation R70 of 12 February 2010 issued under the Act 36 of 1947 (Fertilizer, Farm Feeds, Agricultural Remedies and Stock Remedies Act). NOTE: SANS 898:2011 Edit…
	7.5	Feed or bedding originating from areas in which wild suids have had access	Feed or bedding for domestic pigs can be contaminated by infected wild boar feces and urine	Bellini, et al., 2021	Introduction	Use trusted feed and beeding sources; Ban on using straw for bedding of pigs unless treated to inactivate ASF virus or stored (out of reach of wild boar) for at least 90 days before use. Stock-proof fencing of premises where feed and bedding are kept.	Fasina, et al., 2020; Biocheck	5.1 Each farm must have a plan indicating building layout, location of the loading ramps, manure dams and area where dead pigs are disposed of. 6.8 Provision shall be made where post mortem examination can take place. All waste from the post mortem area must be disposed of in a biosecure manner. 9.3 Dead animals must be disposed of in an acceptable manner according to a standard operating procedu…
	7.6	Improper disposal of domestic pig carcasses and manure	Free-ranging and wild pigs can come into contact with improperly disposed carcasses and manure	Bellini, et al., 2021	Spread	Bury carcasses and organs to a proper depth (3 m) following slaughter. Safely dispose of manure away from scavengers.	DAFF, 2011; EC, 2015; Biocheck	4.1.1 Home-mixers: All feed additives, vitamin & mineral premixes, or macro minerals including orally administered products must be registered in terms of Act 36 or be accompanied by a certificate guaranteeing that they comply with the Regulation R70 of 12 February 2010 issued under the Act 36 of 1947 (Fertilizer, Farm Feeds, Agricultural Remedies and Stock Remedies Act). NOTE: SANS 898:2011 Edit…
	7.7	Feeding contaminated fresh grass, seeds, or crops	fresh grass, seeds, or crops contaminated with wild suid feces containing ASF virus	Bellini, et al., 2021	Introduction	Use trusted feed and beeding sources; Ban of feeding fresh grass or grains to pigs unless treated to inactivate ASF virus or stored (out of reach of wild boar) for at least 30 days before feeding	DAFF, 2011; Biocheck	5.4 A stormwater management plan must be in place to ensure that stormwater leaving the site does not contain any unwanted substances and should be kept separate from the biodegradable industrial wastewater. 9.1 Biodegradable Industrial Wastewater generated on site and any subsequent fractions thereof (liquid and solid fractions) must be handled in compliance with the applicable Section 21 activi…
	7.8	Streams and rivers which serve as common water source for drinking for livestock	Waste waters used for washing of carcasses and intestines during slaughter sometimes flowed into the holding tanks and overflowed to contaminate nearby streams with ASF virus	Fasina, et al., 2020; Bellini, et al., 2021	Introduction	Use a known safe water source and effluent system. Properly manage effluent system.	Fasina, et al., 2020; EC, 2015	1.1.1 All pig production areas / units must be totally and effectively fenced (pig proof) with a fence that is a minimum of 1.8m high. All access gates must be closed and locked at all times. Limited access shall be allowed. Highly recommended that a concrete or similar base be used to secure bottom of the fence and to prevent animals burrowing under fence. 1.1.2 An SOP is required detailing when…
	7.9	Presence of scavengers within the compartment	Scavengers, such as the sacred ibis, that feed on slaughter remains and discarded pork products can act as fomites for ASF virus spread	Fasina, et al., 2020	Spread	Control scavenger access to pig farm or around the farm. Fence in compartments with non-porous/stock-proof fencing. Bury carcasses and organs to a proper depth (3 m) following slaughter.	Fasina, et al., 2020; EC, 2015	1.1.1 All pig production areas / units must be totally and effectively fenced (pig proof) with a fence that is a minimum of 1.8m high. All access gates must be closed and locked at all times. Limited access shall be allowed. Highly recommended that a concrete or similar base be used to secure bottom of the fence and to prevent animals burrowing under fence. 1.1.2 An SOP is required detailing when…
	7.1	Presence of scavengers in proximity to the compartment	Scavengers, such as the sacred ibis, that feed on slaughter remains and discarded pork products can act as fomites for ASF virus spread	Fasina, et al., 2020	Spread	Control scavenger access to pig farm or around the farm. Fence in compartments with non-porous/stock-proof fencing. Bury carcasses and organs to a proper depth (3 m) following slaughter.	DAFF, 2011; Biocheck	3.1 A comprehensive documented program (SOP) shall be in place for the control and extermination of vectors (rats/ mice/ flies / insects, feral cats) where necessary. A responsible person must be identified and trained as pest control officer. All pest control stations, if used, must be clearly indicated on the farm plan
	7.11	Pests (mice, rats, birds)	Pests can act as fomites	DAFF, 2011		Pest control

## Sheet: Sheet2
0	Negligible
1	very poor
2	poor
3	medium
4	high
5	very high
NA	Not Applicable

## Sheet: Annex
Category	Code	Risk Factor	Description	Reference (risk factor)	Relevance towards Intro/ Spread/ Both	Reccomended Preventive Measure against risk factor	Reference (preventive measures)	Pork 360 Standards (relevant against risk factor)	Relevance of the risk factor for SAPPO compartments (*). Drop down menu is provided clicking in the cell.		(*) This is intended as an average score indicating how much a specific risk factor is relevant , on average, for the majority of SAPPO compartments. The score is on a scale from 0 (negligible) to 5 (very high). In case a general assessment cannot be made due to very different situation between farms please rate as NA (Not applicable).
Domestic pigs	1.1	Domestic pig and smallholder density	If there is a high density of pigs on farms or or a high density of smallholders within administrative areas, there is a higher chance of introduction and spread through direct and indirect contact. This risk factor can be subclassified by production system.	Huang, et al., 2017; Bellini, et al., 2021	Both	Follow ideal stocking density recommendations. Separate sick pigs.	Fasina, et al., 2020; Biocheck	5.1 On the farm plan the number of pens/crates, the area of pens/ size of crates, area per pen, maximum number of pigs per pen and the number of pigs that can be housed in each and every building. (NB if pens of differing sizes are present in a house the information on area, space allowed and max. animals/pen must be reflected for the different size pens). 5.3.3 The minimum floor space allowances…
	1.2	Proximity to an infected farm	Compartments that are geographically close to ASF infected farms are at higher risk of becoming infected through direct and indirect transmission	Bellini, et al., 2021	Both	Compartments neighboring infected farms implement a provisional quarantine of the compartment
	1.3	Introduction of new pigs to a farm without testing or quarantine	Introduction of a new pig(s) onto a farm, such as replacement gilts, from a source that is not ASF-free and without testing or quarantine can result in introduction of ASF virus into the farm. Premises with a high number of incoming movements are likely to be at risk of disease introduction.	Bellini, et al., 2021	Introduction	Quarantine newly purchased pigs for at least 10 days. Establish an isolation facility on site. Animal access restrictions and testing	Fasina, et al., 2020; DAFF, 2011; Biocheck	1.5.2 A register of all pigs entering and leaving the unit must be kept. The register must indicate: Source, Contact details, Age at arrival, Treatment on arrival. 1.5.3 All pigs entering the unit must come from a Pork 360 unit.
	1.4	Shared boars for mating	ASF virus can be transmitted through semen, resulting in introduction and spread to sows on different farms	Fasina, et al., 2020	Both	Use artifical insemination from known ASF-free sources. No sows and/or boar used for reproduction are allowed on non-commercial farms.	DAFF, 2011; EC, 2015; Biocheck
	1.5	Presence of free-roaming pigs within the compartment	Free-ranging husbandry system have implications for ASF transmission through direct and indirect contact with domestic and wild pigs (ingestion of contaminated slaughter remains and pork products)	Fasina, et al., 2020; Bellini, et al., 2021	Both	Fence in compartment with non-porous fencing. Keep pigs indoors.	Fasina, et al., 2020; DAFF, 2011	1.1.1 All pig production areas / units must be totally and effectively fenced (pig proof) with a fence that is a minimum of 1.8m high. All access gates must be closed and locked at all times. Limited access shall be allowed. Highly recommended that a concrete or similar base be used to secure bottom of the fence and to prevent animals burrowing under fence. 1.1.2 An SOP is required detailing when…
	1.6	Presence of free-roaming pigs in proximity to the compartment	Scavenging pigs around the compartments have implications for ASF transmission through direct and indirect contact (ingestion of contaminated slaughter remains and pork products)	Fasina, et al., 2020	Both	Fence in compartment with non-porous fencing. Keep pigs indoors.	Fasina, et al., 2020	1.1.1 All pig production areas / units must be totally and effectively fenced (pig proof) with a fence that is a minimum of 1.8m high. All access gates must be closed and locked at all times. Limited access shall be allowed. Highly recommended that a concrete or similar base be used to secure bottom of the fence and to prevent animals burrowing under fence. 1.1.2 An SOP is required detailing when…
	1.7	Pigs presented at the abattoir, slaughter slabs, markets, auctions and returned home afterwards	Direct contact of pigs at abattoirs, slaughter slabs, markets, and auctions can result in transmission, especially if those pigs travel back to their home farms or to another farm without being slaughtered	Fasina, et al., 2020	Both	Avoid the purchase of animals, limit the frequency of introduction, limit the number of source herds, source herds with a high health status. Avoid bringing pigs back home from the slaughter house because they are not slaughtered.	Biocheck
	1.8	Outgoing pig movements	Premises with a high number of outgoing movements are key players for the disease spread	Bellini, et al., 2021	Spread	Limit the number of outgoing pig movements through all-in-all-out systems/Increase traceability	Fasina, et al., 2020	1.5.2 A register of all pigs entering and leaving the unit must be kept. The register must indicate: Source, Contact details, Age at arrival, Treatment on arrival.
Wild suids	2.1	Wild suid species occurrence within the compartment	Percentage area in each compartment entity that is occupied by each wild suid species is considered. Then whether or not the wild suid species occurrences were correlated with ASF occurrence is tested.	Huang, et al., 2017	Both	Stock-proof fencing of at least the compartment/ stable where pigs are kept. Keep pigs indoors. Targeted hunting/culling is encouraged in order to target adult and sub-adult females. The minimum biosecurity requirements for hunters are applied. Surveillance of wild boar.	Fasina, et al., 2020; EC, 2015
	2.2	Wild suid species occurrence in proximity to the compartment	Percentage area in proximity to the compartment entity that is occupied by each wild suid species is calculated. Then whether or not the wild suid species occurrences were correlated with ASF occurrence is tested.	Huang, et al., 2017	Both	Stock-proof fencing of at least the compartment/ stable where pigs are kept. Keep pigs indoors. Targeted hunting/culling is encouraged in order to target adult and sub-adult females. The minimum biosecurity requirements for hunters are applied. Surveillance of wild boar.	Fasina, et al., 2020; EC, 2015
	2.3	Direct and indirect contact between wild and domestic suids	Where there is no or porous fencing of the compartment, there can be direct and indirect contact between wild and domestic suids	Bellini, et al., 2021	Both	Stock-proof fencing of at least the compartment/ stable where pigs are kept. Keep pigs indoors. Targeted hunting/culling is encouraged in order to target adult and sub-adult females. The minimum biosecurity requirements for hunters are applied. Surveillance of wild boar.	Fasina, et al., 2020; EC, 2015	1.1.1 All pig production areas / units must be totally and effectively fenced (pig proof) with a fence that is a minimum of 1.8m high. All access gates must be closed and locked at all times. Limited access shall be allowed. Highly recommended that a concrete or similar base be used to secure bottom of the fence and to prevent animals burrowing under fence. 1.1.2 An SOP is required detailing when…
	3.1	Human population density	Human population density is an indicator of trade activities. Calculated for each administrative area	Huang, et al., 2017; Bellini, et al., 2021	Both
	3.2	Trade route distribution	In combination with pig cases and human distribution	Bellini, et al., 2021	Both
Human behaviors and activities (trades, hunting etc..)	3.3	Pig trader, middlemen, and transporter behavior	Pig traders and middlemen travel around to buy pigs in bulk from multiple sources, farms and locations. They enter many farms directly to buy pigs and move live pigs from farms to markets and vice versa. Some districts share livestock markets with neighboring districts. Many pigs, bought from different homesteads, may be transported together to the markets in the same vehicles (pick-up vans, smal…	Fasina, et al., 2020; Bellini, et al., 2021	Both	Regulate access to farms/Hand sanitizer, gloves and washing	Fasina, et al., 2020
	3.4	Pig-keeper visitors and Livestock field officers/ veterinarians/ para-veterinarians	People who handle pigs in different capacities meet at the slaughter facilities or each others homes where they can spread the ASF virus to pigs via fomites and contaminated pork products. Livestock field officers who visit farms and abattoirs who don't always properly clean and disinfect their clothes and equipment between sites can act as fomites for ASF virus	Fasina, et al., 2020; Bellini, et al., 2021	Both	Register of visitors. Declaration for employees and visitors. No unauthorized persons/transport are allowed to enter the pig holding (stable) and records are kept of people and vehicles accessing the area where the pigs are kept. Foot dips for disinfection before the house. Change rubber boots/slippers. Change clothing when going in/out of pig pen. Make hand sanitizer, gloves and washing availabl…	Fasina, et al., 2020; DAFF, 2011; EC, 2015; Biocheck	1.3.1 Access of humans must be described in an SOP and should take place as follows: It is a pre-requisite that under all circumstances, persons entering the unit will shower into the unit and be provided with clean clothing on the other side of the shower. Cross contamination between own clothing and the piggery’s clothing must be prevented. When leaving the unit again persons will shower out an…
Human behaviors and activities (trades, hunting etc..)	3.5	Swill feeding	Feeding of commercial or household food waste containing contaminated pork products or blood to pigs can be a source of indirect transmission. The contaminated meat may have been stored chilled, frozen, or treated and may have been kept over long periods of time	Bellini, et al., 2020	Introduction	Prohibit swill feeding and enforce removal of animal by-products. Raise awareness through risk communication.	DAFF, 2011; EC, 2015	4.1.1 Home-mixers: All feed additives, vitamin & mineral premixes, or macro minerals including orally administered products must be registered in terms of Act 36 or be accompanied by a certificate guaranteeing that they comply with the Regulation R70 of 12 February 2010 issued under the Act 36 of 1947 (Fertilizer, Farm Feeds, Agricultural Remedies and Stock Remedies Act). NOTE: SANS 898:2011 Edit…
	3.6	Illegal animal/ pork movements and imports	In smallholdings and in free-ranging pigs, there is often a low level of compliance with legal requirements on registration and identification of pigs and these deficiencies reduce the effectiveness of disease management, hampering the eradication process. illegal trades of livestock occur across the borders and may have facilitated the introduction and transmission	Bellini, et al., 2021	Both	Raise awareness through risk communication
	3.7	Lack of identification of pig and documentation of pig movements	Poor traceability can promote ASF spread	Bellini, et al., 2021	Both	Use an animal identification system and keep records of animal health and movements	Fasina, et al., 2020; DAFF, 2011	6.3.1 The following is necessary with regards to marking of pigs: All pigs must be tattooed with a registered tattoo mark by the time they are weaned. 6.3.2 A copy of the Registration certificate must be available in SOP master file. 6.3.3 All pigs must be marked with their week of birth (tattoo or ear notch)
	3.8	Abandoning or intentional feeding of leftovers in wild suid habitats	Contaminated pork products may be consumed/trasnported by wild pigs or other scavengers animals (birds). Artifical feeding of wild boar can result in ASF virus spread.	Bellini, et al., 2021	Spread	Prohibit feeding of wild boar through risk communication, regulations, and signage.	EC, 2015	2.1.4 A canteen (if meals are consumed within the biosecurity area), must be provided, and all food must be taken directly to the designated eating facility. No pork or raw meat is allowed in the unit/canteen. Employees are only allowed to eat in the designated eating facility, no food shall be taken into pig housing.
	3.9	Usage of out-of-farm pig semen, ova or embryos	ASF virus can be spread through breeding practices	Bellini, et al., 2021	Spread	Use semen/ ova/ embryos from known ASF-free sources	DAFF, 2011
	3.1	Suspected cases underreporting, and “emergency sales”	Weaker monitoring and traceability	Bellini, et al., 2021	Spread	Raise awareness on the importance of reporting suspect cases to veterinary and livestock field officers during ASF outbreaks. Build trust through risk communication.	Fasina, et al., 2020	6.9 All deaths of post-weaning animals and adult animals must be recorded in a register indicating suspected reasons.
	3.11	Illegal slaughtering and slaughtering of sick pigs	Weaker monitoring and traceability	Bellini, et al., 2021	Spread	Raise awareness through risk communication		6.7 Producers shall liaise with the relevant abattoir should they have a need for emergency slaughter. No systemically ill pigs shall be marketed for slaughter.
	3.12	Slaughtering on the farm	Spread of contaminated blood	Bellini, et al., 2021	Spread	Home slaughtering is allowed only under veterinary supervision.	EC, 2015	6.7 Producers shall liaise with the relevant abattoir should they have a need for emergency slaughter. No systemically ill pigs shall be marketed for slaughter.
	3.13	Higher levels of human deprivation/ poverty	Lower compliance to report and test if there is no financial compensation for culling	Bellini, et al., 2021	Spread	Adequate financial compensation. Risk communication.	Bellini, et al., 2021
	3.14	Cultural identity associated with backyard farming	Lower compliance to bring pigs indoors, strengthen biosecurity measures	Bellini, et al., 2021	Spread	Raise awareness through risk communication
	3.15	Hunting of wild suids within the compartment	Direct and indirect contact between wild pigs and wild pig carcasses and the soil beneath the carcasses. Hunting of wild suids including as a deterrant to incursion on or near farms can result in spread by wild suid blood. Density of hunters, hunting dogs, feeding/baiting locations, and hunted wild pigs.	Bellini, et al., 2021	Spread	Avoid hunting or culling wild boar within the compartmnet. No contact with pigs within 48h after hunting activity. Find and dispose of wild boar carcasses quickly. The disposal of carcasses to be carried out either by deep burial, bringing to the rendering plant or burning (under supervision of the competent veterinary authorities). Possible use of appropriate chemicals for local disinfection.	Bellini, et al., 2021; EC, 2015
	3.16	Hunting of wild suids in proximity of the compartment	Direct and indirect contact between wild pigs and wild pig carcasses and the soil beneath the carcasses. Hunting of wild suids including as a deterrant to incursion on or near farms can result in spread by wild suid blood. Density of hunters, hunting dogs, feeding/baiting locations, and hunted wild pigs.	Bellini, et al., 2022	Spread	No contact with pigs within 48h after hunting activity. Find and dispose of wild boar carcasses quickly. The disposal of carcasses to be carried out either by deep burial, bringing to the rendering plant or burning (under supervision of the competent veterinary authorities). Possible use of appropriate chemicals for local disinfection.	Bellini, et al., 2021; EC, 2016
Competent vectors	4.1	Presence of the tick vector (tampans) in and around the compartment	The distribution of the tick vector O. savignyi (tampan) has an effect on ASF spread at the regional scale. With the tick distribution map, the probabilities of tick presence for each administrative area are averaged. In case of free roamning of pigs ticks can attach to domestic pigs and transmit the disease	Huang, et al., 2017; Bellini, et al., 2021	Both	Tick control and surveillance/Domestic pigs movement control
	4.2	Presence of biting flies in and around the compartment	Biting flies, such as Stomoxys calcitrans, can transmit the ASF virus via bites or by oral ingestion of infected flies	Bellini et al., 2021	Spread	Fly control
Habitat	5.1	Wild pig habitat area	Habitat structure can influence ASF transmission by affecting host distribution and movements. Overlap of wild and domestic pig habitats	Huang, et al., 2017; Bellini, et al., 2021	Both	Surveillance of wild boar populations. Monitor movements of wild boar.
	5.2	Wild suid habitat isolation and fragmentation	Fragmentation and isolation of wild suid grazing areas can effect the risk of ASF occurrence. Lack of a suitable habitat for wild pigs can drive them into domestic pig habitats.	Huang, et al., 2017; Bellini, et al., 2021	Both	Surveillance of wild boar populations. Monitor movements of wild boar.
Climate	6.1	Annual mean temperature including in preceding year	Temperature can affect ASF transmission by influencing the movements and habitat use of wild suid species. Because of the adaptive process of hosts and ticks, the climatic variables might show lag-effects on pathogen transmission.	Huang, et al., 2017	Both	Surveillance of wild boar and tick populations. Monitor movements of wild boar.
	6.2	Annual mean precipitation including in preceding year	Precipitation can affect ASF transmission by influencing the movements and habitat use of wild suid species. Because of the adaptive process of hosts and ticks, the climatic variables might show lag-effects on pathogen transmission	Huang, et al., 2017	Both	Surveillance of wild boar and tick populations. Monitor movements of wild boar.	DAFF, 2011; EC, 2015; Biocheck	1.4.1 No unauthorised vehicle may enter the fenced pig farming area. An SOP describing authorised and unauthorised vehicles must be in place. All vehicles authorised to enter shall have their tyres and undercarriages decontaminated and disinfected before entering the production unit. 1.4.2 A detailed register of all vehicles entering the unit must be kept. 10.3 All vehicles must be cleaned and di…
Fomites	7.1	Vehicles as fomites	If vehicles used to transport live pigs and pork products are not cleaned & disinfected properly between pig shipments, they can act as fomites for ASFv	Fasina, et al., 2020; Bellini, et al., 2021	Both	Washing and disinfection including of vehicles. Designated area for washing and disinfection of vehicles. Vehicle Access restrictions and biosecurity. Down time for vehicles. Use appropriate vehicle stocking densities. Biosecurity plan approved/recommended by veterinary services	Fasina, et al., 2020; EC, 2015; Biocheck	1.3.1 Access of humans must be described in an SOP and should take place as follows: It is a pre-requisite that under all circumstances, persons entering the unit will shower into the unit and be provided with clean clothing on the other side of the shower. Cross contamination between own clothing and the piggery’s clothing must be prevented. When leaving the unit again persons will shower out an…
	7.2	Clothes & boots as fomites	Clothes worn by farmers, slaughter workers, veterinary officers and any other person who handles pigs can act as fomites of the ASF virus if not cleaned and disinfected properly or if PPE is not used	Fasina, et al., 2020; Bellini, et al., 2021	Both	Foot dips for disinfection before the house. Change rubber boots/slippers. Change clothing when going in/out of pig pen. Biosecurity plan approved/recommended by veterinary services	Fasina, et al., 2020; EC, 2015; Biocheck	7.1 The correct procedures for cleaning and disinfecting shall be established. The procedures need to be developed in consultation with a pig veterinary consultant and include: Physical cleaning, Washing and drying, Disinfecting, Rest period
	7.3	Facilities and equipment	Lack of cleaning and disinfection of facilities and equipment	Bellini, et al., 2021	Both	Routine (regular) cleaning with effective disinfectants. Remove manure and litter routinely. Biosecurity plan approved/recommended by veterinary services	EC, 2015	7.1 The correct procedures for cleaning and disinfecting shall be established. The procedures need to be developed in consultation with a pig veterinary consultant and include: Physical cleaning, Washing and drying, Disinfecting, Rest period
	7.4	Shared equipment between farms and slaughter houses	Lack of cleaning and disinfection of equipment between uses, even when used with symptomatic animals. Lack of cleaning and disinfection of slaughter facilities can lead to ASF virus spread via slaughterhouse workers.	Fasina, et al., 2020	Both	Biosecurity plan approved/recommended by veterinary services	DAFF, 2011; EC, 2015	4.1.1 Home-mixers: All feed additives, vitamin & mineral premixes, or macro minerals including orally administered products must be registered in terms of Act 36 or be accompanied by a certificate guaranteeing that they comply with the Regulation R70 of 12 February 2010 issued under the Act 36 of 1947 (Fertilizer, Farm Feeds, Agricultural Remedies and Stock Remedies Act). NOTE: SANS 898:2011 Edit…
	7.5	Feed or bedding originating from areas in which wild suids have had access	Feed or bedding for domestic pigs can be contaminated by infected wild boar feces and urine	Bellini, et al., 2021	Introduction	Use trusted feed and beeding sources; Ban on using straw for bedding of pigs unless treated to inactivate ASF virus or stored (out of reach of wild boar) for at least 90 days before use. Stock-proof fencing of premises where feed and bedding are kept.	Fasina, et al., 2020; Biocheck	5.1 Each farm must have a plan indicating building layout, location of the loading ramps, manure dams and area where dead pigs are disposed of. 6.8 Provision shall be made where post mortem examination can take place. All waste from the post mortem area must be disposed of in a biosecure manner. 9.3 Dead animals must be disposed of in an acceptable manner according to a standard operating procedu…
Fomites	7.6	Improper disposal of domestic pig carcasses and manure	Free-ranging and wild pigs can come into contact with improperly disposed carcasses and manure	Bellini, et al., 2021	Spread	Bury carcasses and organs to a proper depth (3 m) following slaughter. Safely dispose of manure away from scavengers.	DAFF, 2011; EC, 2015; Biocheck	4.1.1 Home-mixers: All feed additives, vitamin & mineral premixes, or macro minerals including orally administered products must be registered in terms of Act 36 or be accompanied by a certificate guaranteeing that they comply with the Regulation R70 of 12 February 2010 issued under the Act 36 of 1947 (Fertilizer, Farm Feeds, Agricultural Remedies and Stock Remedies Act). NOTE: SANS 898:2011 Edit…
	7.7	Feeding contaminated fresh grass, seeds, or crops	fresh grass, seeds, or crops contaminated with wild suid feces containing ASF virus	Bellini, et al., 2021	Introduction	Use trusted feed and beeding sources; Ban of feeding fresh grass or grains to pigs unless treated to inactivate ASF virus or stored (out of reach of wild boar) for at least 30 days before feeding	DAFF, 2011; Biocheck	5.4 A stormwater management plan must be in place to ensure that stormwater leaving the site does not contain any unwanted substances and should be kept separate from the biodegradable industrial wastewater. 9.1 Biodegradable Industrial Wastewater generated on site and any subsequent fractions thereof (liquid and solid fractions) must be handled in compliance with the applicable Section 21 activi…
	7.8	Streams and rivers which serve as common water source for drinking for livestock	Waste waters used for washing of carcasses and intestines during slaughter sometimes flowed into the holding tanks and overflowed to contaminate nearby streams with ASF virus	Fasina, et al., 2020; Bellini, et al., 2021	Introduction	Use a known safe water source and effluent system. Properly manage effluent system.	Fasina, et al., 2020; EC, 2015	1.1.1 All pig production areas / units must be totally and effectively fenced (pig proof) with a fence that is a minimum of 1.8m high. All access gates must be closed and locked at all times. Limited access shall be allowed. Highly recommended that a concrete or similar base be used to secure bottom of the fence and to prevent animals burrowing under fence. 1.1.2 An SOP is required detailing when…
	7.9	Presence of scavengers within the compartment	Scavengers, such as the sacred ibis, that feed on slaughter remains and discarded pork products can act as fomites for ASF virus spread	Fasina, et al., 2020	Spread	Control scavenger access to pig farm or around the farm. Fence in compartments with non-porous/stock-proof fencing. Bury carcasses and organs to a proper depth (3 m) following slaughter.	Fasina, et al., 2020; EC, 2015	1.1.1 All pig production areas / units must be totally and effectively fenced (pig proof) with a fence that is a minimum of 1.8m high. All access gates must be closed and locked at all times. Limited access shall be allowed. Highly recommended that a concrete or similar base be used to secure bottom of the fence and to prevent animals burrowing under fence. 1.1.2 An SOP is required detailing when…
	7.1	Presence of scavengers in proximity to the compartment	Scavengers, such as the sacred ibis, that feed on slaughter remains and discarded pork products can act as fomites for ASF virus spread	Fasina, et al., 2020	Spread	Control scavenger access to pig farm or around the farm. Fence in compartments with non-porous/stock-proof fencing. Bury carcasses and organs to a proper depth (3 m) following slaughter.	DAFF, 2011; Biocheck	3.1 A comprehensive documented program (SOP) shall be in place for the control and extermination of vectors (rats/ mice/ flies / insects, feral cats) where necessary. A responsible person must be identified and trained as pest control officer. All pest control stations, if used, must be clearly indicated on the farm plan
	7.11	Pests (mice, rats, birds)	Pests can act as fomites	DAFF, 2011		Pest control
